# Supplementary material
Source: Research Square preprint supplement (doi:10.21203/rs.3.rs-9098532/v1)
Supplement: Supplementary file 1 [file 08fd1f7e937ff027484e03a7.xlsx]

## Sheet: README
Item	Details
Description	Summary source data supporting the tables and figures in the manuscript.
Underlying dataset	Healthcare Cost and Utilization Project National Inpatient Sample (2016-2022).
Restrictions	Patient-level NIS data are subject to HCUP purchase and data use agreement restrictions and are not publicly redistributed here.
Contents of workbook	Selected baseline characteristics, full baseline characteristics, in-hospital outcomes, adjusted mortality model, full cancer subtype distribution, and figure source data.

## Sheet: Table1_selected
Characteristic	Early drainage (day 0)	Delayed drainage (day ≥1)	p value
Age, mean (SE)	59.25 (0.98)	56.66 (1.05)	0.07
Female sex	49.56%	50.90%	0.775
Race or ethnicity			0.157
White	56.95%	59.45%
African American	18.83%	13.36%
Hispanic	14.35%	11.06%
Asian or Pacific Islander	5.38%	6.91%
Native American	0.00%	0.92%
Other	4.48%	8.29%
Hypertension	50.44%	43.50%	0.140
Diabetes mellitus	22.81%	14.35%	0.016
Congestive heart failure	19.74%	17.94%	0.644
Cardiac arrhythmias	42.11%	43.50%	0.747
Valvular heart disease	6.58%	2.69%	0.051
Pulmonary circulation disorder	10.96%	8.52%	0.384
Renal failure	12.28%	10.31%	0.522
Liver disease	8.33%	8.97%	0.811
Coagulopathy	12.28%	13.45%	0.708
Obesity	7.46%	11.21%	0.164
Metastatic cancer	67.98%	60.54%	0.093

## Sheet: TableS1_full_baseline
Characteristic	Early drainage (day 0)	Delayed drainage (day ≥1)	p value
Age, mean (SD)	59.25 (0.98)	56.66 (1.05)	0.07
Female	49.56%	50.90%	0.775
Race			0.157
White	56.95%	59.45%
African American	18.83%	13.36%
Hispanic	14.35%	11.06%
Asian or Pacific Islander	5.38%	6.91%
Native American	0.00%	0.92%
Other	4.48%	8.29%
Hypertension	50.44%	43.50%	0.140
Diabetes mellitus	22.81%	14.35%	0.016
Anemia	2.63%	7.62%	0.016
Congestive heart failure	19.74%	17.94%	0.644
Cardiac arrhythmias	42.11%	43.50%	0.747
Valvular heart disease	6.58%	2.69%	0.051
Pulmonary circulation disorder	10.96%	8.52%	0.384
Peripheral vascular disease	2.63%	1.79%	0.545
Hypertension uncomplicated	31.58%	26.91%	0.265
Paralysis	0.00%	0.90%	0.154
Other neurological disorders	7.46%	5.83%	0.491
Chronic pulmonary disease	18.42%	20.63%	0.554
Diabetes mellitus uncomplicated	12.28%	7.62%	0.095
Diabetes mellitus complicated	11.40%	6.73%	0.093
Hypothyroidism	9.21%	13.90%	0.124
Renal failure	12.28%	10.31%	0.522
Liver disease	8.33%	8.97%	0.811
AIDS or HIV	0.88%	0.45%	0.576
Lymphoma	6.58%	11.66%	0.060
Metastatic cancer	67.98%	60.54%	0.093
Solid tumor without metastasis	71.93%	65.47%	0.152
Rheumatoid disease/collagen vascular disease	1.32%	3.14%	0.188
Coagulopathy	12.28%	13.45%	0.708
Obesity	7.46%	11.21%	0.164
Weight loss	17.54%	18.83%	0.721
Fluid and electrolyte disorders	45.61%	51.57%	0.220
Blood loss anemia	0.00%	0.45%	0.314
Deficiency anemia	2.63%	7.17%	0.025
Alcohol abuse	1.32%	3.59%	0.118
Drug abuse	1.32%	4.93%	0.027
Psychoses	0.44%	0.45%	0.988
Depression	9.65%	8.07%	0.559
Hypertension complicated	18.86%	16.59%	0.531

## Sheet: Table2_outcomes
Outcome	Early drainage (day 0)	Delayed drainage (day ≥1)	p value
In-hospital mortality	8.77%	14.80%	0.052
Length of stay, mean (SE)	7.04 (0.41)	10.12 (0.74)	<0.01
Inflation-adjusted charges, mean (SE)	113922.9 (10415)	174178 (20213)	<0.01

## Sheet: Table3_adjusted_model
Variable	Adjusted OR	95% CI	p value
Delayed drainage (day ≥1 vs day 0)	2.21	1.11–4.41	0.025
Age	1.01	0.98–1.04	0.635
Female sex	1.05	0.56–1.95	0.889
African American race (vs White)	4.13	1.93–8.86	<0.001
Hispanic race (vs White)	1.50	0.59–3.78	0.390
Other race (vs White)	1.11	0.27–4.60	0.886
Hypertension	0.46	0.21–1.02	0.056
Diabetes mellitus	2.34	0.98–5.59	0.056
Congestive heart failure	1.12	0.52–2.43	0.771
Cardiac arrhythmias	2.03	1.01–4.09	0.048
Valvular heart disease	0.66	0.16–2.65	0.558
Pulmonary circulation disorder	0.49	0.14–1.72	0.264
Renal failure	0.83	0.35–1.98	0.676
Liver disease	2.21	0.86–5.71	0.100
Coagulopathy	3.70	1.62–8.46	0.002
Obesity	0.54	0.14–2.15	0.385

## Sheet: Cancer_subtypes_full
Cancer type	Weighted %
Respiratory cancer	28.27
Breast cancer	8.23
Head and neck cancer	2.32
Esophageal and stomach cancer	2.11
Colorectal cancer	1.90
Ovarian cancer	1.90
Prostate cancer	1.90
Bladder cancer	1.27
Heart cancer	1.05
Melanoma	1.05
Bone cancer	0.84
Sarcoma	0.84
Cervical cancer	0.63
Testicular cancer	0.63
Neuroendocrine/pancreatic cancer	0.63
Bile duct cancer	0.42
Fallopian tube cancer	0.42
Thymus cancer	0.42
Adrenal cancer	0.21
Anal cancer	0.21
Gallbladder cancer	0.21
Peritoneal cancer	0.21
Other gastrointestinal cancer	0.21
Other male reproductive cancer	0.21
Liver cancer	0.00
Uterine cancer	0.00
Endometrial cancer	0.00
Vulvar cancer	0.00
Vaginal cancer	0.00
Other female reproductive cancer	0.00
Penile cancer	0.00
Urethral cancer	0.00
Other kidney/urinary cancer	0.00
Other central nervous system cancer	0.00
Parathyroid cancer	0.00
Pituitary cancer	0.00
Other neurologic cancer	0.00

## Sheet: Figure1_source
Cancer type	Weighted %
Respiratory cancer	28.27
Breast cancer	8.23
Head and neck cancer	2.32
Esophageal and stomach cancer	2.11
Prostate cancer	1.9
Ovarian cancer	1.9
Colorectal cancer	1.9
Bladder cancer	1.27
Melanoma	1.05
Heart cancer	1.05

## Sheet: Figure2_source
Variable	OR	CI_low	CI_high
Delayed drainage (day ≥1 vs day 0)	2.21	1.11	4.41
Age	1.01	0.98	1.04
Female sex	1.05	0.56	1.95
African American race	4.13	1.93	8.86
Hispanic race	1.5	0.59	3.78
Other race	1.11	0.27	4.6
Hypertension	0.46	0.21	1.02
Diabetes mellitus	2.34	0.98	5.59
Congestive heart failure	1.12	0.52	2.43
Cardiac arrhythmias	2.03	1.01	4.09
Valvular heart disease	0.66	0.16	2.65
Pulmonary circulation disorder	0.49	0.14	1.72
Renal failure	0.83	0.35	1.98
Liver disease	2.21	0.86	5.71
Coagulopathy	3.7	1.62	8.46
Obesity	0.54	0.14	2.15
